# Supplementary material for: Role of Alterations in Protein Kinase p38γ in the Pathogenesis of the Synaptic Pathology in Dementia With Lewy Bodies and α-Synuclein Transgenic Models
Source: PubMed Central journal article supplement (PMC7138105; doi:10.3389/fnins.2020.00286), 2020-03-31
Supplement: Data_Sheet_1.pdf [file Data_Sheet_1.pdf]

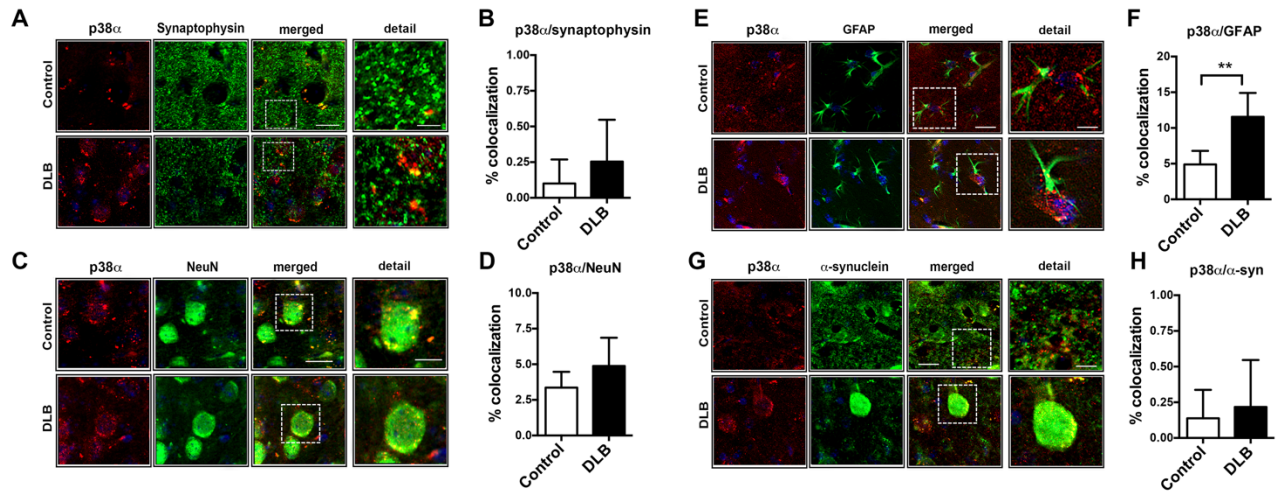

**Supplementary Figure 1.** Double immunohistochemical analysis of p38 $\alpha$  cellular localization in DLB and control brains. Vibratome sections from the frontal cortex were double immunofluorescence labeled with antibodies against p38 $\alpha$  (red) and neuronal and glial cell markers (green) and analyzed with Apotome II mounted in a Carl Zeiss Axiolmager Z1 microscope. Far right (detail): enlarged image of the area contained in the dotted square. **(A)** p38 $\alpha$  (red) and the pre-synaptic marker synaptophysin (green); **(B)** image analysis showing low levels of colocalization of p38 $\alpha$  to synapses; **(C)** p38 $\alpha$  (red) and the neuronal marker NeuN (green); **(D)** image analysis showing modest localization of p38 $\alpha$  in neurons; **(E)** p38 $\alpha$  (red) and the astroglial cell marker GFAP (green); **(F)** image analysis showing increased localization of p38 $\alpha$  to astroglia in DLB cases; **(G)** p38 $\alpha$  (red) and  $\alpha$ -synuclein (green); **(H)** image analysis showing minimal colocalization of p38 $\alpha$  to Lewy bodies in DLB cases. Scale bars are 10  $\mu$ m in the standard panels and 5  $\mu$ m in the zoomed panels (detail). Image analysis represents % colocalization between the two markers.  $n = 8$  for control and  $n = 12$  for DLB (\*\* $p < 0.05$ ).

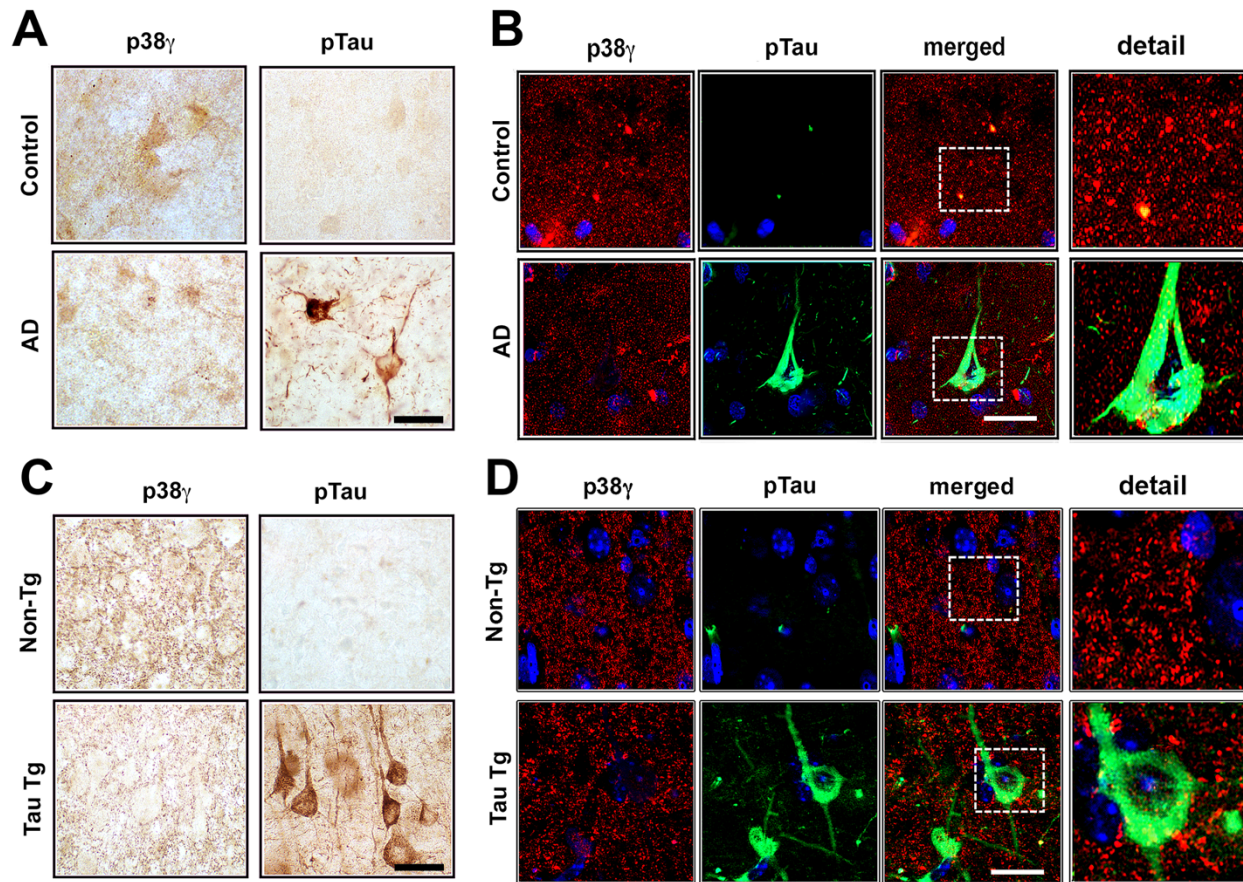

**Supplementary Figure 2.** Immunohistochemical analysis of the distribution of p38 $\gamma$  in AD and 3RTau Tg mice. Vibratome sections from the frontal cortex were immunolabeled with antibodies against pTau (AT8) and p38 $\gamma$  and developed with DAB. **(A)** Representative bright field microscopic images (630X) (scale bar = 20  $\mu$ m) of human brains from healthy controls and AD patients immunostained with antibodies against pTau (top) and p38 $\gamma$  (bottom). **(B)** Vibratome sections from the frontal cortex of human control and AD cases were double immunofluorescence labeled with antibodies against p38 $\gamma$  (red) and pTau (AT8) markers (green) and analyzed with Apotome II mounted in a Carl Zeiss AxioImager Z1 microscope. Far right (detail): enlarged image of the area contained in the dotted square. **(C)** Representative bright field microscopic images (630X) (scale bar = 20  $\mu$ m) of non-Tg and 3RTau Tg mice immunostained with antibodies against pTau (top) and p38 $\gamma$  (bottom). **(D)** Vibratome sections from brains of non-Tg and 3RTau Tg mice were double immunofluorescence labeled with antibodies against p38 $\gamma$  (red) and pTau (AT8) markers (green) and analyzed with Apotome II mounted in a Carl Zeiss AxioImager Z1 microscope. Far right (detail): enlarged image of the area contained in the dotted square.

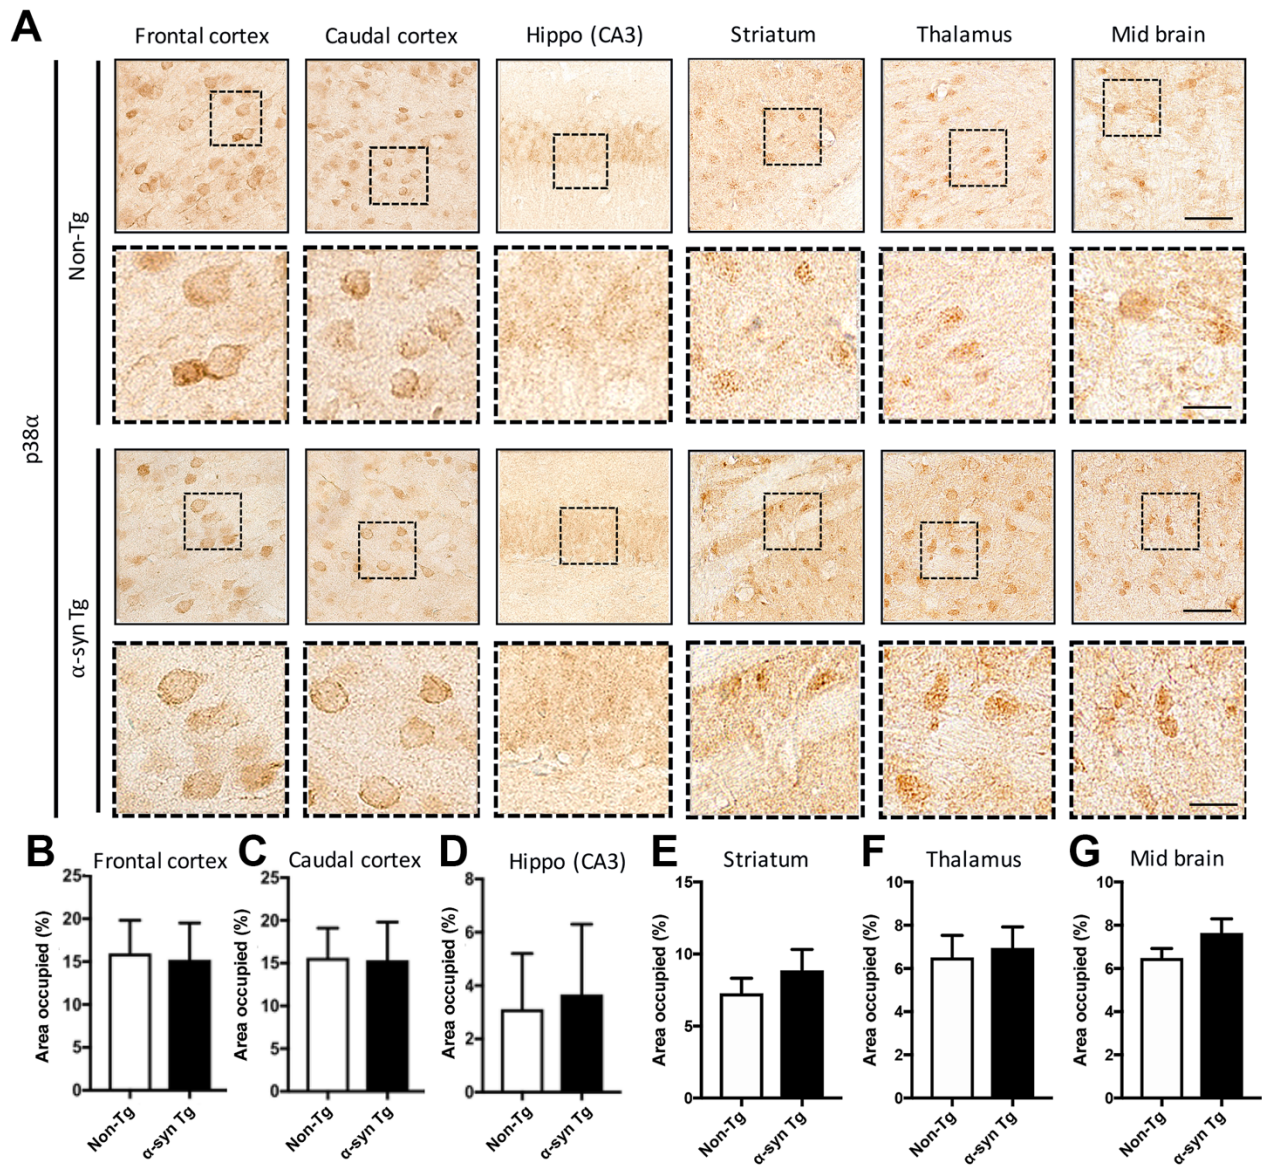

**Supplementary Figure 3.** Immunohistochemical analysis of the distribution of p38 $\alpha$  in brains in non-Tg and  $\alpha$ -syn Tg mouse brains. Sagittal vibratome sections from complete right hemibrains were immunolabeled an antibody against p38 $\alpha$  and developed with DAB. **(A)** Panels with a solid outline show representative low power bright field microscopic images (200x) (scale bar = 100  $\mu$ m) of non-Tg (top) and  $\alpha$ -syn Tg (bottom) mouse brains immunostained with p38 $\alpha$ ; panels with a dotted outline show enlarged images (630X) (scale bar = 20  $\mu$ m) of the indicated region of interest. **(B-G)** Image analysis of % area occupied by p38 $\alpha$ -immunostained cells in the frontal cortex **(B)**, caudal cortex **(C)**, hippocampus **(D)**, striatum **(E)**, thalamus **(F)** and mid brain **(G)**. n = 6 per group.

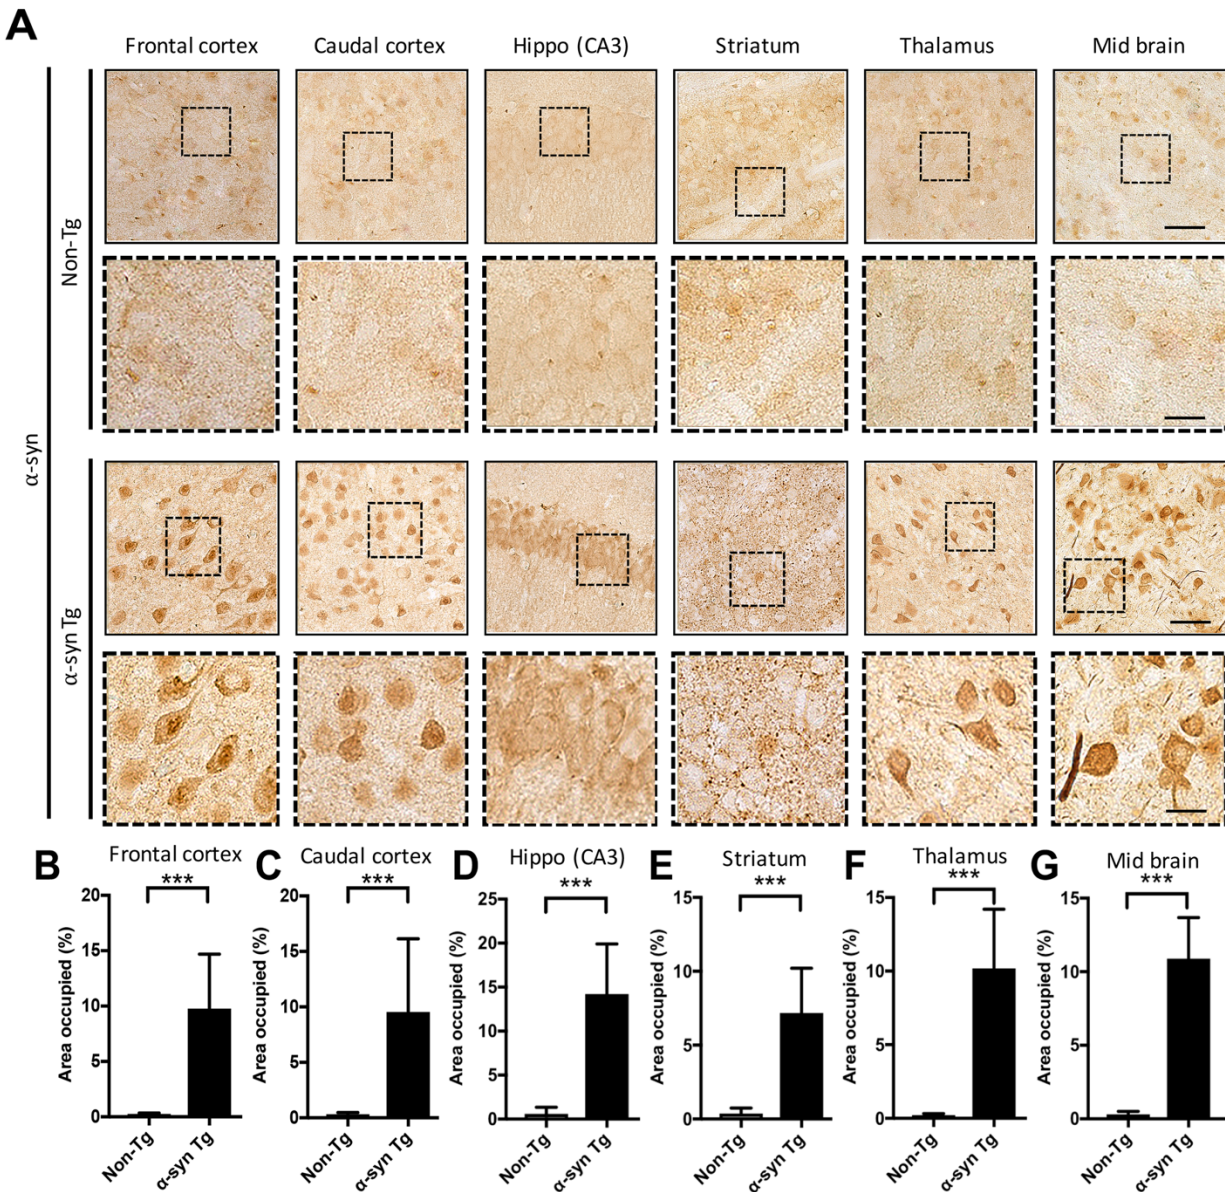

**Supplementary Figure 4.** Immunohistochemical analysis of the distribution of  $\alpha$ -synuclein in non-Tg and  $\alpha$ -syn Tg mouse brains. Sagittal vibratome sections from complete right hemibrains were immunolabeled with an antibody against total mouse and human  $\alpha$ -syn (Syn-1 BD) and developed with DAB. **(A)** Panels with a solid outline show representative low power bright field microscopic images (200x) (scale bar = 100  $\mu$ m) of non-Tg (top) and  $\alpha$ -syn Tg (bottom) mouse brains immunostained with Syn-1; panels with a dotted outline show enlarged images (630X) (scale bar = 20  $\mu$ m) of the indicated region of interest. **(B-G)** Image analysis of percent area occupied by  $\alpha$ -syn-immunostained cells in the frontal cortex **(B)**, caudal cortex **(C)**, hippocampus **(D)**, striatum **(E)**, thalamus **(F)** and mid brain **(G)**.  $n = 6$  per group ( $***p < 0.001$ ).

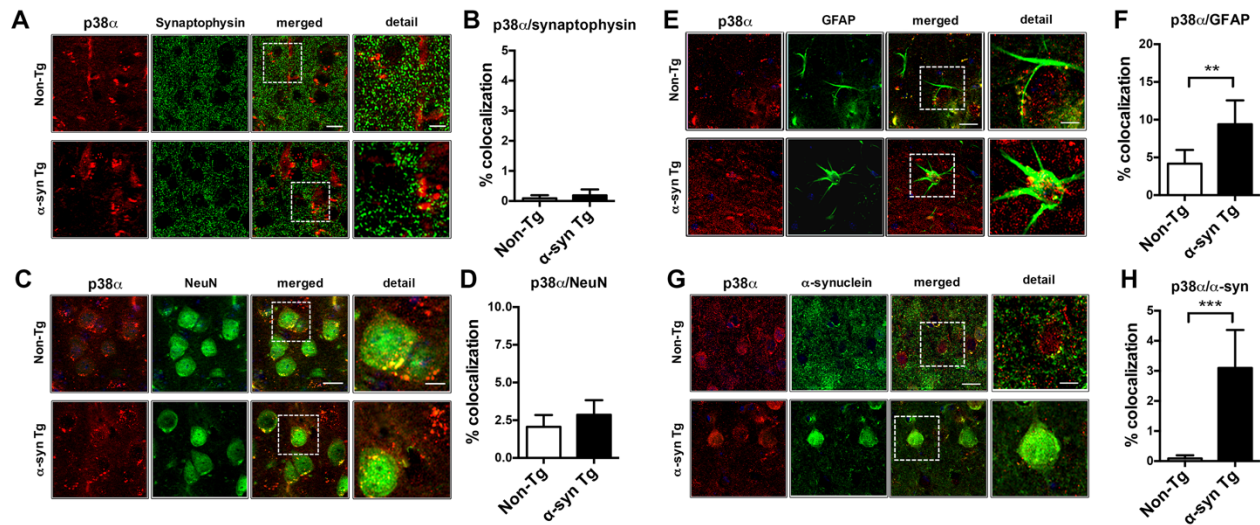

**Supplementary Figure 5.** Double immunohistochemical analysis of p38 $\alpha$  cellular localization in non-Tg and  $\alpha$ -syn Tg mouse brains. Vibratome sections of murine brains were double immunofluorescence labeled with antibodies against p38 $\alpha$  (red) and neuronal and glial cell markers (green) and analyzed with Apotome II mounted in a Carl Zeiss Axiomager Z1 microscope. Far right (detail): enlarged image of the area contained in the dotted square. **(A)** p38 $\alpha$  (red) and the pre-synaptic marker synaptophysin (green); **(B)** image analysis showing low levels of colocalization of p38 $\alpha$  to synapses; **(C)** p38 $\alpha$  (red) and the neuronal marker NeuN (green); **(D)** image analysis showing modest localization of p38 $\alpha$  to neurons; **(E)** p38 $\alpha$  (red) and the astroglial cell marker GFAP (green); **(F)** image analysis showing increased localization of p38 $\alpha$  to astroglia in  $\alpha$ -syn Tg mice; **(G)** p38 $\alpha$  (red) and  $\alpha$ -synuclein (green); **(H)** image analysis showing some colocalization of p38 $\alpha$  to  $\alpha$ -syn aggregates in the cytoplasm in  $\alpha$ -syn Tg mice. Scale bars are 10  $\mu$ m in the standard panels and 5  $\mu$ m in the zoomed panels. Image analysis represent % colocalization between the two markers. n = 6 per group (\*\* $p$  < 0.01, \*\*\* $p$  < 0.001).
